# Supplementary material for: Identification of CDPK Gene Family in Amorphophallus konjac and AkCDPK15 Functional Analysis Under Drought Stress
Source: Research Square preprint supplement (doi:10.21203/rs.3.rs-5457812/v1), 2024-12-03
Supplement: Supplementary file 1 [file 051c59e9a08c4aa9fb2ddebd.pdf]

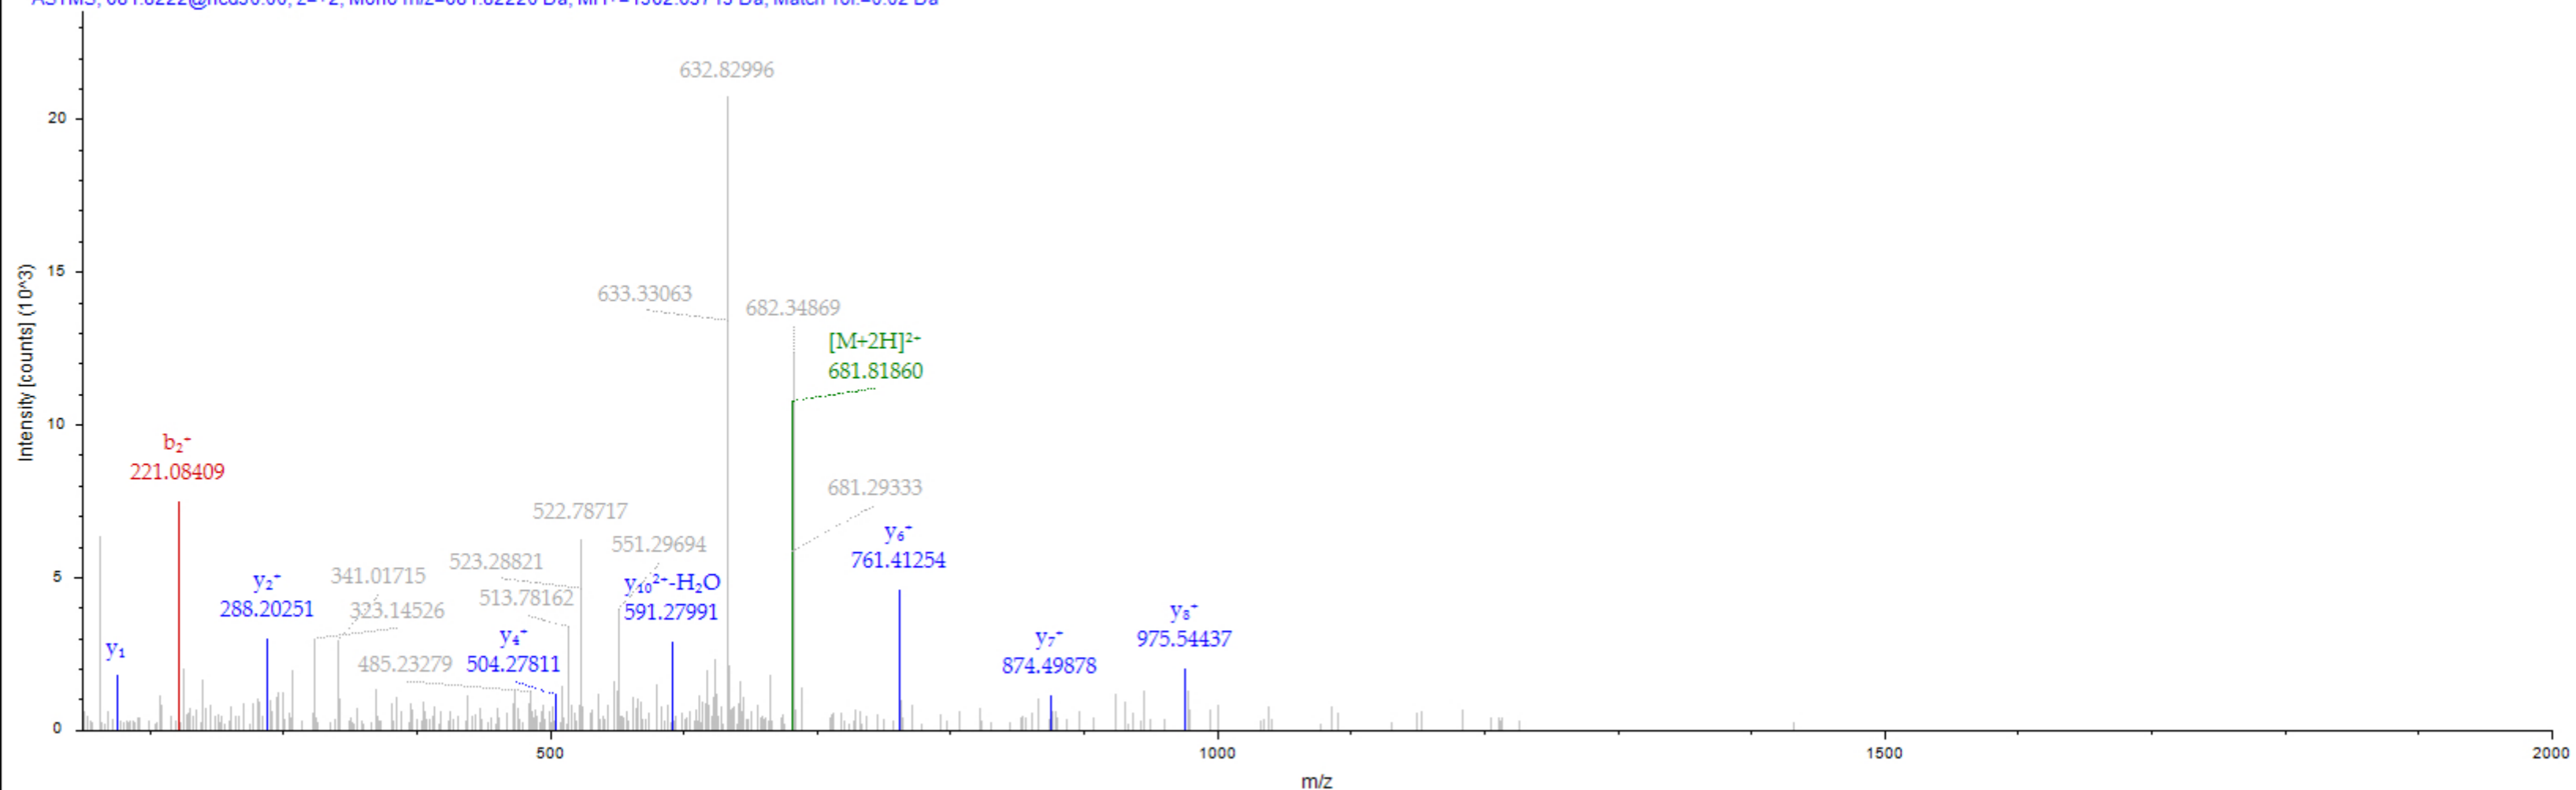

YGSTLKESEIR.(A3)

b, b-H<sub>2</sub>O, b-NH<sub>3</sub>

Precursor, Precursor-H<sub>2</sub>O, Precursor-NH<sub>3</sub>

y, y-H<sub>2</sub>O, y-NH<sub>3</sub>
