# Supplementary material for: Identification of CDPK Gene Family in Amorphophallus konjac and AkCDPK15 Functional Analysis Under Drought Stress
Source: Research Square preprint supplement (doi:10.21203/rs.3.rs-5457812/v1), 2024-12-03
Supplement: Supplementary file 2 [file 09e6fb9bca65f1a785f0de67.xlsx]

## Sheet: Sheet1
Table 1 Characteristics of AKCDPK genes in Amorphophallus konjac.
Gene Name	Gene ID	Chromosome Location	coding sequence length	Amino acid (aa) no.	Molecular weight (Da)	Isoelectric points	GRAVY	No. of EF Hands	N-Acylation Prediction (No.)
AkCDPK1	evm.model.CTG_17200.13.1_Akon	CTG_17200:263057..267912	1494	497	56254.2	5.34	-0.339	2	0
AkCDPK2	evm.model.CTG_17475.4_Akon	CTG_17475:70008..75001	1677	558	62129.6	5.9	-0.328	2	N-Myr (1)-S-Palm (3)
AkCDPK3	evm.model.CTG_18290.6_Akon	CTG_18290:113867..118587	1380	459	51801.1	5.47	-0.345	2	N-Myr (1)–S-Palm (0)
AkCDPK4	evm.model.CTG_20042.12_Akon	CTG_20042:179353..185036	1767	588	65245.2	5.35	-0.332	2	0
AkCDPK5	evm.model.CTG_3081.5_Akon	CTG_3081:112268..117036	1626	541	60596.9	5.4	-0.435	2	N-Myr (1)–S-Palm (3)
AkCDPK6	evm.model.CTG_9134.3_Akon	CTG_9134:65417..85398	1638	545	61434.7	6.56	-0.555	2	N-Myr (1)–S-Palm (1)
AkCDPK7	evm.model.HIC_ASM_0.4363_Akon	HIC_ASM_0:209595801..209690834	1749	582	64668.3	5.95	-0.336	2	N-Myr (1)–S-Palm (2)
AkCDPK8	evm.model.HIC_ASM_0.4386_Akon	HIC_ASM_0:210725827..210794238	1665	554	62771.3	8.79	-0.59	2	N-Myr (1)–S-Palm (2)
AkCDPK9	evm.model.HIC_ASM_0.5124_Akon	HIC_ASM_0:237769900..237776387	1605	534	59417.6	5.84	-0.466	2	N-Myr (1)–S-Palm (1)
AkCDPK10	evm.model.HIC_ASM_0.5128_Akon	HIC_ASM_0:237909385..237915869	1629	542	60692.2	5.99	-0.414	2	N-Myr (1)–S-Palm (1)
AkCDPK11	evm.model.HIC_ASM_0.5318_Akon	HIC_ASM_0:243665230..243669940	1494	497	56254.2	5.34	-0.339	2	N-Myr (1)–S-Palm (0)
AkCDPK12	evm.model.HIC_ASM_0.5386_Akon	HIC_ASM_0:245323336..245339406	1629	542	60526.9	5.16	-0.296	2	N-Myr (1)–S-Palm (1)
AkCDPK13	evm.model.HIC_ASM_1.10394.2_Akon	HIC_ASM_1:473829711..473843511	1629	542	60450.9	5.19	-0.292	2	N-Myr (1)–S-Palm (1)
AkCDPK14	evm.model.HIC_ASM_1.1830_Akon	HIC_ASM_1:50282319..50299659	1647	548	62047.7	9.08	-0.514	2	N-Myr (1)–S-Palm (1)
AkCDPK15	evm.model.HIC_ASM_11.3224_Akon	HIC_ASM_11:79853509..79858908	1602	533	60074.4	6.02	-0.505	2	N-Myr (1)–S-Palm (1)
AkCDPK16	evm.model.HIC_ASM_11.5617_evm.model.HIC_ASM_11.5618_Akon	HIC_ASM_11:206243534..206313183	1602	533	60060.4	6.02	-0.506	2	N-Myr (1)–S-Palm (1)
AkCDPK17	evm.model.HIC_ASM_4.1275_Akon	HIC_ASM_4:33212080..33215666	1683	560	63368.4	6.25	-0.483	2	N-Myr (1)–S-Palm (1)
AkCDPK18	evm.model.HIC_ASM_4.2160.1_Akon	HIC_ASM_4:61367073..61413550	1647	548	62028.6	9.01	-0.512	2	N-Myr (1)–S-Palm (2)
AkCDPK19	evm.model.HIC_ASM_4.2288.1_Akon	HIC_ASM_4:64437246..64442101	1713	570	64886.1	6.81	-0.494	2	0
AkCDPK20	evm.model.HIC_ASM_4.2664_Akon	HIC_ASM_4:74975034..74980004	1602	533	60057.7	5.91	-0.434	2	N-Myr (1)–S-Palm (3)
AkCDPK21	evm.model.HIC_ASM_5.10001_Akon	HIC_ASM_5:430159214..430172624	1713	570	64818	6.81	-0.487	2	N-Myr (1)–S-Palm (2)
AkCDPK22	evm.model.HIC_ASM_5.11603_Akon	HIC_ASM_5:468342621..468347497	1851	616	66940.8	4.85	-0.242	2	N-Myr (1)–S-Palm (2)
AkCDPK23	evm.model.HIC_ASM_5.11616_Akon	HIC_ASM_5:468702494..468707370	1380	459	51801.1	5.47	-0.345	2	N-Myr (1)–S-Palm (2)
AkCDPK24	evm.model.HIC_ASM_5.8866_Akon	HIC_ASM_5:402294432..402317205	1563	520	57603.9	5.86	-0.186	2	N-Myr (1)–S-Palm (4)
AkCDPK25	evm.model.HIC_ASM_5.9948_Akon	HIC_ASM_5:429025695..429046511	1599	532	59536	6.15	-0.453	2	N-Myr (1)–S-Palm (2)
AkCDPK26	evm.model.HIC_ASM_9.420_Akon	HIC_ASM_9:11640424..11657737	1566	521	58269.4	6.13	-0.448	2	N-Myr (2)–S-Palm (3)
AkCDPK27	evm.model.HIC_ASM_9.462_Akon	HIC_ASM_9:12209941..12217085	1638	545	60892.2	6.12	-0.457	2	N-Myr (1)–S-Palm (2)
AkCDPK28	evm.model.HIC_ASM_9.721_Akon	HIC_ASM_9:17049898..17063692	1632	543	60748.1	6.12	-0.456	2	N-Myr (2)–S-Palm (3)
AkCDPK29	evm.model.HIC_ASM_9.7625_Akon	HIC_ASM_9:356624016..356745767	1677	558	62129.6	5.9	-0.328	2	N-Myr (1)–S-Palm (1)
