# Supplementary material for: Identification of CDPK Gene Family in Amorphophallus konjac and AkCDPK15 Functional Analysis Under Drought Stress
Source: Research Square preprint supplement (doi:10.21203/rs.3.rs-5457812/v1), 2024-12-03
Supplement: Supplementary file 7 [file b759c00f912ad89833852c18.xlsx]

## Sheet: Sheet1
Table s2 NCBI accession ID for transcriptome of Amorphophallus konjac
Tissue	NCBI accession ID
Leaf	SRR14711870
FLOWER	SRR14711869
ROOT	SRR14711868
petiole1	SRR11212517
petiole2	SRR11212518
petiole3	SRR11212513
corm1	SRR14711876
	SRR14711877
	SRR14711867
corm2	SRR14711863
	SRR14711864
	SRR14711865
	SRR14711866
corm3	SRR14711860
	SRR14711861
	SRR14711862
	SRR14711875
corm4	SRR14711871
	SRR14711872
	SRR14711873
	SRR14711874
